# Supplementary material for: The heat of formation of gaseous PuO22+from relativistic density functional calculations
Source: Royal Society of Chemistry journal article supplement (doi:10.1039/b607292e), 2006-01-01
Supplement: b607292e.pdf [file b607292e.pdf]

---

**Supplementary information to be published electronically**

---

**The heat of formation of gaseous  $\text{PuO}_2^{2+}$  from relativistic density functional calculations**

Lyudmila V. Moskaleva, Alexei V. Matveev, Joachim Dengler, and Notker Rösch  
*Department Chemie, Theoretische Chemie,  
Technische Universität München, 85747 Garching, Germany*

**Table S1. Cartesian coordinates (in Å, VWN) of various species used in the model reactions R1–R21**

| Species                        | Symmetry        | Atom | X         | Y         | Z         |
|--------------------------------|-----------------|------|-----------|-----------|-----------|
| PuF <sub>6</sub>               | O <sub>h</sub>  | Pu   | 0.000000  | 0.000000  | 0.000000  |
|                                |                 | F    | 1.960042  | 0.000000  | 0.000000  |
|                                |                 | F    | 0.000000  | 1.960042  | 0.000000  |
|                                |                 | F    | 0.000000  | -1.960042 | 0.000000  |
|                                |                 | F    | -1.960042 | 0.000000  | 0.000000  |
|                                |                 | F    | 0.000000  | 0.000000  | 1.943737  |
|                                |                 | F    | 0.000000  | 0.000000  | -1.943737 |
| PuF <sub>4</sub>               | C <sub>3v</sub> | Pu   | 0.000000  | 0.000000  | -1.133427 |
|                                |                 | F    | 0.000000  | 0.000000  | 0.857939  |
|                                |                 | F    | 1.946621  | 0.000000  | -1.610118 |
|                                |                 | F    | -0.973311 | 1.685823  | -1.610118 |
|                                |                 | F    | -0.973311 | -1.685823 | -1.610118 |
| PuO <sub>2</sub>               | D <sub>∞h</sub> | Pu   | 0.000000  | 0.000000  | 0.000000  |
|                                |                 | O    | 0.000000  | 0.000000  | 1.760479  |
|                                |                 | O    | 0.000000  | 0.000000  | -1.760479 |
| PuO <sub>2</sub> <sup>2+</sup> | D <sub>∞h</sub> | Pu   | 0.000000  | 0.000000  | 0.000000  |
|                                |                 | O    | 0.000000  | 0.000000  | 1.663157  |
|                                |                 | O    | 0.000000  | 0.000000  | -1.663157 |
| HCO <sup>+</sup>               | C <sub>∞v</sub> | C    | 0.000000  | 0.000000  | 0.000000  |
|                                |                 | H    | 0.000000  | 0.000000  | 1.110392  |
|                                |                 | O    | 0.000000  | 0.000000  | -1.109466 |
| HCO                            | C <sub>s</sub>  | C    | 0.001018  | 0.380865  | 0.000000  |
|                                |                 | H    | -0.478169 | 1.416027  | 0.000000  |
|                                |                 | O    | 1.165666  | 0.203984  | 0.000000  |
| CO <sup>+</sup>                | C <sub>∞v</sub> | C    | 0.000000  | 0.000000  | 0.000000  |
|                                |                 | O    | 0.000000  | 0.000000  | 1.118211  |
| CO                             | C <sub>∞v</sub> | C    | 0.000000  | 0.000000  | 0.000000  |

|                  |                 |   |           |           |           |
|------------------|-----------------|---|-----------|-----------|-----------|
|                  |                 | O | 0.000000  | 0.000000  | 1.132409  |
| NO <sup>+</sup>  | C <sub>∞v</sub> | N | 0.000000  | 0.000000  | -0.001076 |
|                  |                 | O | 0.000000  | 0.000000  | 1.119287  |
| NO               | C <sub>∞v</sub> | N | 0.000000  | 0.000000  | 0.000000  |
|                  |                 | O | 0.000000  | 0.000000  | 1.184222  |
| CN <sup>+</sup>  | C <sub>∞v</sub> | C | 0.000000  | 0.000000  | -0.021360 |
|                  |                 | N | 0.000000  | 0.000000  | 1.144916  |
| CN               | C <sub>∞v</sub> | C | 0.000000  | 0.000000  | -0.023617 |
|                  |                 | N | 0.000000  | 0.000000  | 1.147173  |
| HCN              | C <sub>∞v</sub> | C | 0.000000  | 0.000000  | 0.000000  |
|                  |                 | H | 0.000000  | 0.000000  | 1.078667  |
|                  |                 | N | 0.000000  | 0.000000  | -1.154638 |
| H <sub>2</sub>   | D <sub>∞h</sub> | H | 0.000000  | 0.000000  | 0.383982  |
|                  |                 | H | 0.000000  | 0.000000  | -0.383982 |
| CH <sub>4</sub>  | T <sub>d</sub>  | C | 0.000000  | 0.000000  | 0.000000  |
|                  |                 | H | 0.635080  | 0.635080  | 0.635080  |
|                  |                 | H | 0.635080  | -0.635080 | -0.635080 |
|                  |                 | H | -0.635080 | 0.635080  | -0.635080 |
|                  |                 | H | -0.635080 | -0.635080 | 0.635080  |
| F <sub>2</sub>   | D <sub>∞h</sub> | F | 0.000000  | 0.000000  | 0.700384  |
|                  |                 | F | 0.000000  | 0.000000  | -0.700384 |
| N <sub>2</sub>   | D <sub>∞h</sub> | N | 0.000000  | 0.000000  | 0.550759  |
|                  |                 | N | 0.000000  | 0.000000  | -0.550759 |
| HF               | C <sub>∞v</sub> | F | 0.000000  | 0.000000  | -0.204553 |
|                  |                 | H | 0.000000  | 0.000000  | 0.728439  |
| NF <sub>3</sub>  | C <sub>3v</sub> | N | 0.000000  | 0.000000  | -0.031510 |
|                  |                 | F | 1.236691  | 0.000000  | 0.579409  |
|                  |                 | F | -0.618346 | 1.071006  | 0.579409  |
|                  |                 | F | -0.618346 | -1.071006 | 0.579409  |
| H <sub>2</sub> O | C <sub>2v</sub> | O | 0.000000  | 0.000000  | -0.057858 |
|                  |                 | H | 0.774468  | 0.000000  | 0.528929  |
|                  |                 | H | -0.774468 | 0.000000  | 0.528929  |

**Table S2. Total energies (in au) at the GGA-PBEN level of the various species used in model reactions R1–R21, determined in single-point fashion at the DKnuc-SR and the DKee1 levels of theory. To estimate the effect of spin-orbit interaction ( $\Delta E$ ) for open-shell systems, results of DKnuc-SR calculations are also provided, where the dependence of the exchange-correlation functional on the spin density (SD negl.) has been neglected. Two models for estimating  $\Delta E$  were used. M1: high-spin adiabatic model; M2: closed-shell adiabatic model (see text for details).**

| Species                        | DKnuc-SR      | DKnuc-SR (SD negl.)                      | DKee1                                    |
|--------------------------------|---------------|------------------------------------------|------------------------------------------|
| PuF <sub>6</sub>               | -30150.987974 | -30150.954059 (M1)<br>-30151.006693 (M2) | -30241.235195 (M1)<br>-30241.289937 (M2) |
| PuF <sub>4</sub>               | -29951.073672 | -29950.976904 (M1)<br>-29951.026148 (M2) | -30041.246789 (M1)<br>-30041.298283 (M2) |
| PuO <sub>2</sub>               | -29701.673716 | -29701.554547 (M1)<br>-29701.623640 (M2) | -29791.800360 (M1)<br>-29791.880775 (M2) |
| PuO <sub>2</sub> <sup>2+</sup> | -29700.832632 | -29700.805103 (M1)<br>-29700.808301 (M2) | -29791.058070 (M1)<br>-29791.067033 (M2) |
| HCO <sup>+</sup>               |               | -113.665470                              | -113.674830                              |
| HCO                            | -113.970980   | -113.955290                              | -113.964650                              |
| CO <sup>+</sup>                | -112.916734   | -112.883894                              | -112.893813                              |
| CO                             |               | -113.425160                              | -113.435103                              |
| NO <sup>+</sup>                |               | -129.675900                              | -129.687010                              |
| NO                             | -130.016700   | -130.005110                              | -130.016520                              |
| CN <sup>+</sup>                |               | -92.276499                               | -92.271940                               |
| CN                             | -92.805570    | -92.785790                               | -92.792790                               |
| HCN                            |               | -93.513220                               | -93.520190                               |
| H <sub>2</sub>                 |               | -1.178360                                | -1.178370                                |
| CH <sub>4</sub>                |               | -40.552110                               | -40.554750                               |
| F <sub>2</sub>                 |               | -199.749080                              | -199.768880                              |
| N <sub>2</sub>                 |               | -109.636151                              | -109.644890                              |
| HF                             |               | -100.565980                              | -100.575910                              |
| NF <sub>3</sub>                |               | -354.500020                              | -354.534090                              |
| H <sub>2</sub> O               |               | -76.515050                               | -76.521800                               |

**Table S3. Spin-contamination in terms of expectation values of  $\hat{S}^2$  of the Kohn-Sham determinant for Pu species studied in this work, calculated at the DKnuc-SR GGA-PBEN level of theory.**

| Species                        | State                        | $\langle \hat{S}^2 \rangle$ |
|--------------------------------|------------------------------|-----------------------------|
| PuF <sub>6</sub>               | <sup>3</sup> T <sub>1g</sub> | 2.037                       |
| PuF <sub>4</sub>               | <sup>5</sup> A <sub>1</sub>  | 6.018                       |
| PuO <sub>2</sub>               | <sup>5</sup> Σ <sub>g</sub>  | 6.035                       |
| PuO <sub>2</sub> <sup>2+</sup> | <sup>3</sup> H <sub>g</sub>  | 2.018                       |
|                                | <sup>3</sup> Σ <sub>g</sub>  | 2.023                       |
